# Supplementary material
Source: MDPI journal article supplement (https://www.mdpi.com/2073-4433/15/3/305)
Supplement: s1 [file s1]

# Evaluation of Surrogate Aerosol Experiments to Predict Spreading and Removal of Virus-Laden Aerosols

## Supplementary Materials

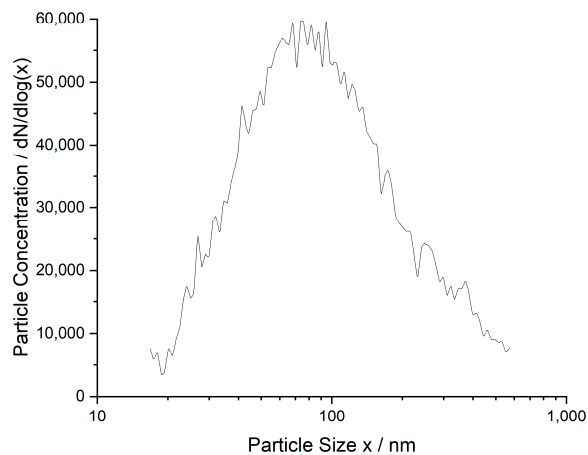

Figure S1: particle size distribution of the salt aerosol

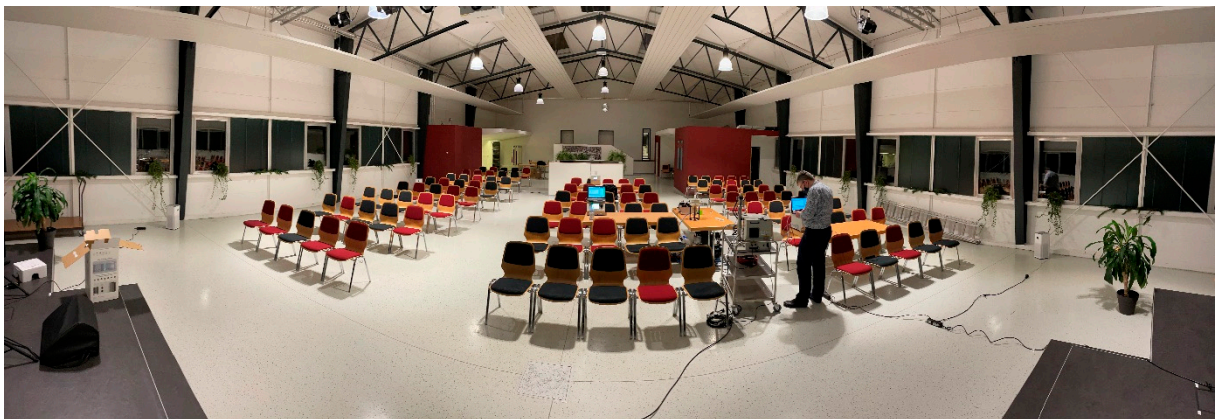

Figure S2: photo of the community hall setup

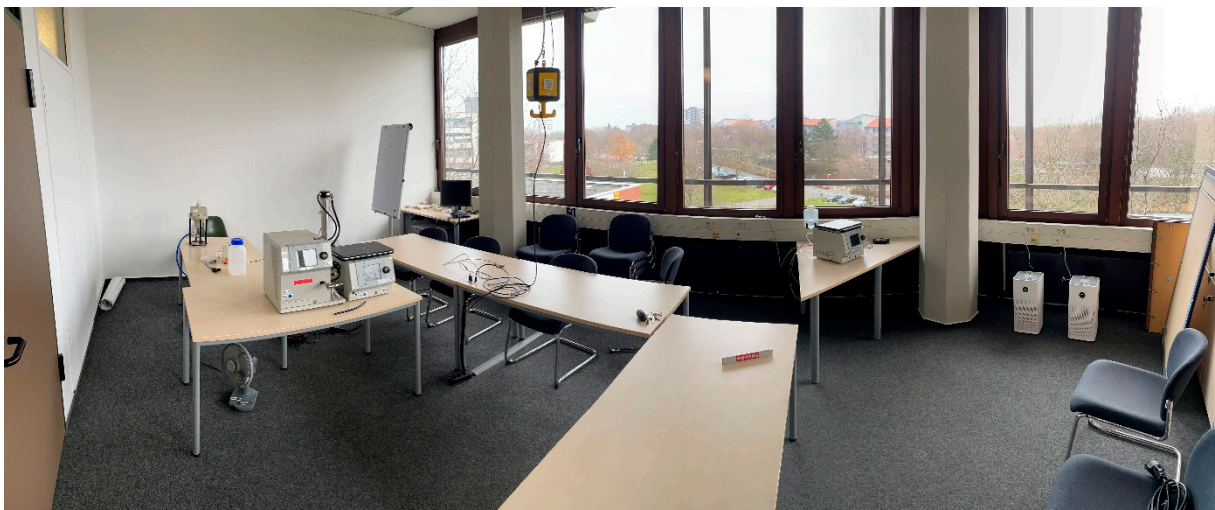

Figure S3: photo of the seminar room setup
